# Supplementary material
Source: HighWire-hosted journal article supplement (https://bmjopen.bmj.com/content/6/9/e010756)
Supplement: inline-supplementary-material-1 [file inline-supplementary-material-1.pdf]

**Supplementary Table 1****Appropriateness of Examination Orders Reported by Medical Centers and Local Institutions**

| Inclusion of Clinical History in Examination Orders                |                                    |                                       |
|--------------------------------------------------------------------|------------------------------------|---------------------------------------|
| Proportion of Examination Orders Containing the Clinical History * | Reported by Medical Centers (N=18) | Reported by Local Institutions (N=15) |
| < 40%                                                              | 2 (11%)                            | 8 (53%)                               |
| 40-60%                                                             | 3 (17%)                            | 2 (13%)                               |
| 60-100%                                                            | 13 (72%)                           | 5 (34%)                               |

The inclusion of complete clinical history in examination orders in different numerical levels was taken as an indicator of examination order appropriateness. Statistical independence between clinical history preparation and hospital categories was analyzed through chi-square test, revealing significant differences ( $p < 0.050$ ) in the inclusion of clinical history between medical centers and local institutions.

\*  $p = 0.028$  for the significant difference of clinical history inclusion between medical centers and local institutions with the chi-square test.

**Supplementary Table 2**  
**Summary of Examination Scheduling**

| Access Times <sup>a</sup> (Times for Next Available Appointments) |        |                     |         |
|-------------------------------------------------------------------|--------|---------------------|---------|
| (Unit: Days)                                                      |        |                     |         |
|                                                                   | Median | Interquartile Range | p-value |
| <b>MRI*</b>                                                       |        |                     |         |
| MC (N= 18)                                                        | 7.00   | 29.50               | 0.034   |
| LI (N= 15)                                                        | 3.50   | 3.50                |         |
| <b>CT</b>                                                         |        |                     |         |
| MC (N= 18)                                                        | 4.65   | 7.00                | 0.095   |
| LI (N= 16)                                                        | 2.65   | 2.13                |         |
| <b>Ultrasonography</b>                                            |        |                     |         |
| MC (N= 14)                                                        | 7.00   | 10.75               | 0.610   |
| LI (N= 8)                                                         | 8.00   | 11.28               |         |
| <b>Mammography</b>                                                |        |                     |         |
| MC (N= 16)                                                        | 2.00   | 4.00                | 0.105   |
| LI (N= 12)                                                        | 1.00   | 0.60                |         |
| <b>Special Procedures</b>                                         |        |                     |         |
| MC (N= 18)                                                        | 2.50   | 2.75                | 0.246   |
| LI (N= 15)                                                        | 2.00   | 1.25                |         |

<sup>a</sup> Access time (wait time till scheduled exams) did not include the time of pre-scheduled follow-up appointments. The Mann-Whitney U two-tailed test was applied for the statistical analysis.

\* A significant statistical difference ( $p < 0.050$ ) in the access time of MRI between medical centers and local institutions.

Abbreviation: MC, medical centers; LI, local institutions.

### Supplementary Table 3

#### The Performance of Healthcare Education among Radiologists, Radiologic Technologist, and Nurses in Medical Centers versus Local Institutions

| Patient Education (Multiple Sources) |                        |             |                         |          |
|--------------------------------------|------------------------|-------------|-------------------------|----------|
|                                      | Total No. of Hospitals | Radiologist | Radiologic Technologist | Nurse    |
| <b>MRI*</b>                          |                        |             |                         |          |
| MC                                   | 18                     | 4 (22%)     | 10 (56%)                | 14 (78%) |
| LI                                   | 16                     | 1 (6%)      | 14 (88%)                | 12 (75%) |
| <b>CT**</b>                          |                        |             |                         |          |
| MC                                   | 18                     | 5 (28%)     | 10 (56%)                | 17 (94%) |
| LI                                   | 16                     | 1 (6%)      | 12 (75%)                | 12 (75%) |
| <b>Ultrasonography</b>               |                        |             |                         |          |
| MC                                   | 14                     | 4 (29%)     | 10 (71%)                | 2 (14%)  |
| LI                                   | 10                     | 2 (20%)     | 8 (80%)                 | 2 (20%)  |
| <b>Mammography</b>                   |                        |             |                         |          |
| MC                                   | 18                     | 2 (11%)     | 18 (100%)               | 2 (11%)  |
| LI                                   | 16                     | 0 (0%)      | 16 (100%)               | 1 (6%)   |
| <b>Special Procedures***</b>         |                        |             |                         |          |
| MC                                   | 18                     | 14 (78%)    | 8 (44%)                 | 12 (67%) |
| LI                                   | 16                     | 7 (44%)     | 12 (75%)                | 12 (75%) |
| <b>Total****</b>                     |                        |             |                         |          |
| MC                                   | 86                     | 29 (34%)    | 56 (65%)                | 47 (55%) |
| LI                                   | 64                     | 11 (17%)    | 62 (97%)                | 39 (61%) |

The chi-square test was applied for the statistical analysis.

\* A significant statistical difference ( $p= 0.041$ ) in the performance of patient education led by radiologic technologists for MRI exams between medical centers and local institutions.

\*\* A significant statistical difference ( $p= 0.028$ ) in the performance of patient education led by radiologists for CT exams between medical centers and local institutions.

\*\*\* A significant statistical difference ( $p= 0.042$ ) in the performance of patient education led by radiologists for special radiologic procedures between medical centers and local institutions.

\*\*\*\* Significant statistical differences in the overall performance of patient education led by radiologists ( $p= 0.014$ ) and radiologic technologists ( $p= 0.008$ ) between medical centers and local institutions.

Abbreviation: MC, medical centers; LI, local institutions.

# **Supplementary Table 4**

## **Utilization of Standardized Imaging Protocols Based on Clinical Orders for Each Radiologic Examination**

| Use of Standardized Imaging Protocols |                  |    |         |
|---------------------------------------|------------------|----|---------|
|                                       | No. of Hospitals | %  | p-value |
| <b>MRI</b>                            | MC (N= 18)       | 18 | 1.000   |
|                                       | LI (N= 17)       | 17 |         |
| <b>CT</b>                             | MC (N= 18)       | 18 | 1.000   |
|                                       | LI (N= 17)       | 17 |         |
| <b>Ultrasonography</b>                | MC (N= 15)       | 14 | 0.216   |
|                                       | LI (N= 13)       | 10 |         |
| <b>Mammography</b>                    | MC (N= 18)       | 18 | 1.000   |
|                                       | LI (N= 16)       | 16 |         |
| <b>Special Procedures*</b>            | MC (N= 18)       | 18 | 0.024   |
|                                       | LI (N= 16)       | 12 |         |

The chi-square test was applied for the statistical analysis.

\* A significant statistical difference (p= 0.024) in the utilization of clinical order-based imaging protocols between medical centers and local institutions.

Abbreviation: MC, medical centers; LI, local institutions.

**Supplementary Table 5**

**Statistics of Time-Out Prior to an Interventional or Imaging-Guided Procedure**

|                                                         | No. of Hospitals | %   | p-value |
|---------------------------------------------------------|------------------|-----|---------|
| <b>Time-Out Prior to an Interventional Procedure</b>    |                  |     |         |
| MC (N= 18)                                              | 16               | 89  | 0.581   |
| LI (N= 17)                                              | 14               | 82  |         |
| <b>Time-Out Checklist Archived into Medical Records</b> |                  |     |         |
| MC (N= 17)                                              | 11               | 65  | 0.784   |
| LI (N= 15)                                              | 9                | 60  |         |
| <b>Items of Verification</b>                            |                  |     |         |
| <i>Correctness of patient consents</i>                  |                  |     |         |
| MC (N= 16)                                              | 16               | 100 | 0.277   |
| LI (N= 14)                                              | 13               | 93  |         |
| <i>Correctness of patient identities</i>                |                  |     |         |
| MC (N= 16)                                              | 16               | 100 | 1.000   |
| LI (N= 14)                                              | 14               | 100 |         |
| <i>Correctness of examination procedures</i>            |                  |     |         |
| MC (N= 16)                                              | 16               | 100 | 1.000   |
| LI (N= 14)                                              | 14               | 100 |         |
| <i>Correctness of puncture sites</i>                    |                  |     |         |
| MC (N= 16)                                              | 16               | 100 | 1.000   |
| LI (N= 14)                                              | 14               | 100 |         |
| <i>Readiness of instruments</i>                         |                  |     |         |
| MC (N= 16)                                              | 13               | 81  | 0.351   |
| LI (N= 14)                                              | 13               | 93  |         |

The chi-square test was applied for the statistical analysis.

Abbreviation: MC, medical centers; LI, local institutions.

**Supplementary Table 6**

**Comparison of Radiograph Retake and Suboptimal Radiographs between Medical and Local Institutions**

| Frequencies of Defective Radiographs and Radiograph Retake |        |                     |              |
|------------------------------------------------------------|--------|---------------------|--------------|
| (Unit: % in a Month)                                       |        |                     |              |
|                                                            | Median | Interquartile Range | p-value      |
| Retake Rate*                                               |        |                     |              |
| MC (N= 11)                                                 | 0.03   | 0.04                | 0.029        |
| LI (N= 14)                                                 | 1.00   | 2.18                |              |
| Rate of Suboptimal Radiographs*                            |        |                     |              |
| MC (N= 11)                                                 | 0.00   | 0.01                | 0.001        |
| LI (N= 10)                                                 | 0.64   | 1.84                |              |
| (Unit: No. of Hospitals, %)                                |        |                     |              |
| Major Causes                                               |        | Image Reject        | Image Retake |
| Incorrect positioning                                      |        |                     |              |
| MC                                                         |        | 15 (88%)            | 12 (75%)     |
| LI                                                         |        | 13 (100%)           | 12 (100%)    |
| Wrong imaging location                                     |        |                     |              |
| MC                                                         |        | 9 (53%)             | 9 (56%)      |
| LI                                                         |        | 7 (54%)             | 6 (50%)      |
| Blank image <sup>a</sup>                                   |        |                     |              |
| MC                                                         |        | 7 (41%)             | 8 (50%)      |
| LI                                                         |        | 1 (8%)              | 1 (8%)       |
| Mislabeling of right and left sides                        |        |                     |              |
| MC                                                         |        | 6 (35%)             | 6 (38%)      |
| LI                                                         |        | 4 (31%)             | 4 (33%)      |
| Wrong registration of patient ID                           |        |                     |              |
| MC                                                         |        | 5 (29%)             | 6 (38%)      |
| LI                                                         |        | 3 (23%)             | 5 (42%)      |

The Mann-Whitney U two-tailed test was applied for the statistical analysis of image retake rate and the rate of suboptimal radiographs; the chi-square test was applied for analyzing the major causes of image reject and retake. \* Significant statistical differences ( $p < 0.050$ ) in retake rates of radiographs and defect rates of radiographs between medical centers and local institutions. <sup>‡</sup> Significant statistical differences in the production of blank images as major causes of image reject ( $p= 0.004$ ) and retake ( $p= 0.020$ ) radiographs between medical centers and local institutions. Abbreviation: MC, medical centers; LI, local institutions.

**Supplementary Table 7****Performance of Patient Satisfaction Survey for Each Radiologic Examination during the Study Year**

| Survey Performance for Patient Satisfaction |            |                  |    |         |
|---------------------------------------------|------------|------------------|----|---------|
|                                             |            | No. of Hospitals | %  | p-value |
| MRI                                         |            |                  |    |         |
|                                             | MC (N= 18) | 14               | 78 | 0.227   |
|                                             | LI (N= 17) | 10               | 59 |         |
| CT                                          |            |                  |    |         |
|                                             | MC (N= 18) | 14               | 78 | 0.227   |
|                                             | LI (N= 17) | 10               | 59 |         |
| Ultrasonography                             |            |                  |    |         |
|                                             | MC (N= 16) | 11               | 69 | 0.103   |
|                                             | LI (N= 13) | 5                | 35 |         |
| Mammography                                 |            |                  |    |         |
|                                             | MC (N= 17) | 13               | 77 | 0.452   |
|                                             | LI (N= 17) | 11               | 65 |         |
| Special Procedures                          |            |                  |    |         |
|                                             | MC (N= 17) | 12               | 71 | 0.473   |
|                                             | LI (N= 17) | 10               | 59 |         |
| Total*                                      |            |                  |    |         |
|                                             | MC (N= 86) | 64               | 74 | 0.016   |
|                                             | LI (N= 81) | 46               | 57 |         |

The chi-square test was applied for the statistical analysis.

\* A significant statistical difference ( $p= 0.016$ ) in overall practices of survey for patient satisfaction between medical centers and local institutions. Abbreviation: MC, medical centers; LI, local institutions.

**Supplementary Table 8**

**Report Turnaround Efficiency of Medical Centers versus Local Institutions**

| Turnaround Times (The Time for the Images to be Available to the Radiologist to Write a Final Report) |    |                        |                        |              |             |
|-------------------------------------------------------------------------------------------------------|----|------------------------|------------------------|--------------|-------------|
|                                                                                                       |    | Total No. of Hospitals | (Unit: Days [mean±SD]) |              |             |
|                                                                                                       |    |                        | Inpatients             | EMS Patients | Outpatients |
| <b>MRI</b>                                                                                            |    |                        |                        |              |             |
|                                                                                                       | MC | 18                     | 2.15±0.82              | 0.67±0.43    | 4.72±1.81   |
|                                                                                                       | LI | 15, 16 <sup>a</sup>    | 2.50±1.67              | 1.18±1.65    | 4.81±1.76   |
| <b>CT</b>                                                                                             |    |                        |                        |              |             |
|                                                                                                       | MC | 18                     | 1.12±1.68              | 0.60±0.43    | 4.83±1.76   |
|                                                                                                       | LI | 15, 16 <sup>a</sup>    | 2.44±1.71              | 1.12±1.68    | 4.81±1.76   |
| <b>General Radiography</b>                                                                            |    |                        |                        |              |             |
|                                                                                                       | MC | 18                     | 2.29±1.09              | 1.13±1.52    | 4.72±1.81   |
|                                                                                                       | LI | 15, 16 <sup>a</sup>    | 2.75±1.57              | 1.39±1.72    | 5.25±1.57   |
| <b>Special Procedures</b>                                                                             |    |                        |                        |              |             |
|                                                                                                       | MC | 18                     | 2.21±0.85              | 0.70±0.41    | 4.83±1.76   |
|                                                                                                       | LI | 15, 16 <sup>a</sup>    | 2.31±1.74              | 1.25±1.67    | 4.13±1.89   |

The Student t-test was applied for the analysis.

<sup>a</sup> Numbers of hospitals were 15 for the average reporting time of EMS patients and 16 for the times of both inpatients and outpatients. Abbreviation: MC, medical centers; LI, local institutions.



**Supplementary Table 9****Status of Incidents and the Review in Medical Centers versus Local Institutions**

|                                                            | Median           | Interquartile Range | p-value |
|------------------------------------------------------------|------------------|---------------------|---------|
| Yearly Incident Events                                     |                  |                     |         |
| MC (N= 13)                                                 | 30.00            | 353.50              | 0.624   |
| LI (N= 13)                                                 | 72.00            | 296.50              |         |
| Post-Incident Review and Improvement                       |                  |                     |         |
|                                                            | No. of Hospitals | %                   | p-value |
| Incident recording                                         |                  |                     |         |
| MC (N= 17)                                                 | 17               | 100                 | 0.145   |
| LI (N= 17)                                                 | 15               | 88                  |         |
| Regular review conferences*                                |                  |                     |         |
| MC (N= 18)                                                 | 16               | 89                  | 0.008   |
| LI (N= 17)                                                 | 8                | 47                  |         |
| Post-review reformation with a PDCA procedure <sup>a</sup> |                  |                     |         |
| MC (N= 17)                                                 | 15               | 88                  | 0.106   |
| LI (N= 17)                                                 | 11               | 65                  |         |
| Methods for improving other relevant care quality          |                  |                     |         |
| MC (N= 6)                                                  | 5                | 83                  | 0.264   |
| LI (N= 9)                                                  | 5                | 56                  |         |
| Analyses of patients' appeals                              |                  |                     |         |
| MC (N= 17)                                                 | 15               | 88                  | 0.628   |
| LI (N= 17)                                                 | 14               | 82                  |         |

The Mann-Whitney U test was applied for analyzing yearly incident events; the chi-square test was applied for analyzing post-incident review and improvement.

<sup>a</sup> PDCA procedure is a plan–do–check–act four-step model for carrying out a change.

\* A significant statistical difference (p= 0.008) in holding post-incident regular review conferences between medical centers and local institutions.

Abbreviation: MC, medical centers; LI, local institutions.
